# Supplementary material
Source: publisher site journal article supplement (https://www.dovepress.com/article/304475)
Supplement: Supplementary file 1 [file get_supplementary_file.php]

**Table S1 Priority order of newly upgrading EMS facilities based on increase in population coverage**

| **Upgrading**  **priority** | **Facility**  **type** | **Contribution to coverage (%)** | **Cumulative coverage (%)** | **Upgrading**  **priority** | **Facility**  **type** | **Contribution to coverage (%)** | **Cumulative coverage (%)** |
| --- | --- | --- | --- | --- | --- | --- | --- |
| Facility 1 | PHC | 1.21 | 79.49 | Facility 29 | PHC | 0.14 | 87.48 |
| Facility 2 | PHC | 0.79 | 80.28 | Facility 30 | PHC | 0.14 | 87.62 |
| Facility 3 | Hospital | 0.71 | 80.99 | Facility 31 | Hospital | 0.14 | 87.76 |
| Facility 4 | Hospital | 0.69 | 81.67 | Facility 32 | PHC | 0.14 | 87.90 |
| Facility 5 | PHC | 0.51 | 82.18 | Facility 33 | PHC | 0.13 | 88.03 |
| Facility 6 | PHC | 0.44 | 82.62 | Facility 34 | PHC | 0.13 | 88.16 |
| Facility 7 | PHC | 0.35 | 82.97 | Facility 35 | PHC | 0.13 | 88.29 |
| Facility 8 | PHC | 0.31 | 83.28 | Facility 36 | Hospital | 0.12 | 88.41 |
| Facility 9 | PHC | 0.29 | 83.57 | Facility 37 | Hospital | 0.12 | 88.52 |
| Facility 10 | PHC | 0.29 | 83.86 | Facility 38 | PHC | 0.11 | 88.64 |
| Facility 11 | PHC | 0.27 | 84.13 | Facility 39 | PHC | 0.11 | 88.75 |
| Facility 12 | PHC | 0.26 | 84.39 | Facility 40 | PHC | 0.10 | 88.85 |
| Facility 13 | PHC | 0.22 | 84.62 | Facility 41 | PHC | 0.09 | 88.94 |
| Facility 14 | PHC | 0.22 | 84.84 | Facility 42 | Hospital | 0.09 | 89.03 |
| Facility 15 | PHC | 0.21 | 85.05 | Facility 43 | PHC | 0.09 | 89.12 |
| Facility 16 | PHC | 0.21 | 85.26 | Facility 44 | PHC | 0.08 | 89.21 |
| Facility 17 | Hospital | 0.21 | 85.47 | Facility 45 | PHC | 0.08 | 89.29 |
| Facility 18 | PHC | 0.21 | 85.68 | Facility 46 | PHC | 0.08 | 89.37 |
| Facility 19 | PHC | 0.19 | 85.87 | Facility 47 | Hospital | 0.08 | 89.45 |
| Facility 20 | PHC | 0.18 | 86.05 | Facility 48 | PHC | 0.08 | 89.53 |
| Facility 21 | PHC | 0.18 | 86.23 | Facility 49 | PHC | 0.08 | 89.61 |
| Facility 22 | PHC | 0.17 | 86.40 | Facility 50 | PHC | 0.08 | 89.68 |
| Facility 23 | PHC | 0.17 | 86.56 | Facility 51 | PHC | 0.07 | 89.76 |
| Facility 24 | PHC | 0.17 | 86.73 | Facility 52 | Hospital | 0.07 | 89.83 |
| Facility 25 | PHC | 0.16 | 86.89 | Facility 53 | Hospital | 0.07 | 89.90 |
| Facility 26 | PHC | 0.15 | 87.04 | Facility 54 | PHC | 0.07 | 89.98 |
| Facility 27 | PHC | 0.15 | 87.19 | Facility 55 | PHC | 0.07 | 90.05 |
| Facility 28 | PHC | 0.15 | 87.34 |  |  |  |  |

**Abbreviations:** PHC, primary healthcare institution
